# Supplementary material for: On the interaction of carbon monoxide with ternary Cu/ZnO/Al2O3 catalysts: modeling of dynamic morphological changes and the influence on elementary step kinetics
Source: Royal Society of Chemistry journal article supplement (doi:10.1039/c2cy20189e), 2012-01-01
Supplement: c2cy20189e.pdf [file c2cy20189e.pdf]

## Supplementary

Thermodynamic data, adapted from references <sup>16, 32</sup>:

I: Thermodynamic data, gas phase

| Species           | Vibrational parameters                                               | Ground state energy       |
|-------------------|----------------------------------------------------------------------|---------------------------|
| CO <sub>2,g</sub> | B=0.39 cm <sup>-1</sup> , σ=2, ν=1340, 667(2), 2350 cm <sup>-1</sup> | -433 kJ·mol <sup>-1</sup> |
| CO <sub>g</sub>   | B=1.90 cm <sup>-1</sup> , σ=1, ν=2170 cm <sup>-1</sup>               | -132 kJ·mol <sup>-1</sup> |

II: Thermodynamic data, adsorbed species

| Copper plane | Species                      | Vibrational parameters                            | Ground state energy       |
|--------------|------------------------------|---------------------------------------------------|---------------------------|
| 111,100      | CO <sub>2</sub> <sup>*</sup> | ν=410, 14(2), 1343, 667(2), 2349 cm <sup>-1</sup> | -463 kJ·mol <sup>-1</sup> |
| 111,100      | O <sup>*</sup>               | ν=391, 508(2) cm <sup>-1</sup>                    | -243 kJ·mol <sup>-1</sup> |
| 111,100      | CO <sup>*</sup>              | ν=330, 17(2), 2077 cm <sup>-1</sup>               | -181 kJ·mol <sup>-1</sup> |
| 110          | CO <sub>2</sub> <sup>*</sup> | ν=410, 14(2), 1343, 667(2), 2349 cm <sup>-1</sup> | -463 kJ·mol <sup>-1</sup> |
| 110          | O <sup>*</sup>               | ν=391, 508(2) cm <sup>-1</sup>                    | -243 kJ·mol <sup>-1</sup> |
| 110          | CO <sup>*</sup>              | ν=342, 17(2), 2088 cm <sup>-1</sup>               | -190 kJ·mol <sup>-1</sup> |
